# Supplementary material for: Clinical Course, Antifungal Susceptibility, and Genomic Sequencing of Trichophyton indotineae
Source: PubMed Central journal article supplement (PMC11097098; doi:10.1001/jamadermatol.2024.1126), 2024-05-15
Supplement: jamadermatol-e241126-s002.pdf [file jamadermatol-e241126-s002.pdf]

## Data Sharing Statement

Caplan. Clinical Course, Antifungal Susceptibility, and Genomic Sequencing of Trichophyton indotineae. *JAMA Dermatol*. Published May 15, 2024. doi:10.1001/jamadermatol.2024.1126

### Data

**Data available:** No
